# Supplementary material for: Induction of memory-like dendritic cell responses in vivo
Source: PubMed Central journal article supplement (PMC6609631; doi:10.1038/s41467-019-10486-5), 2019-07-04
Supplement: 41467_2019_10486_MOESM1_ESM.pdf [file 41467_2019_10486_MOESM1_ESM.pdf]

**Supplementary Information**  
**Induction of Memory-like Dendritic Cell Responses in vivo**  
Floyd L. Wormley, Jr. et al.

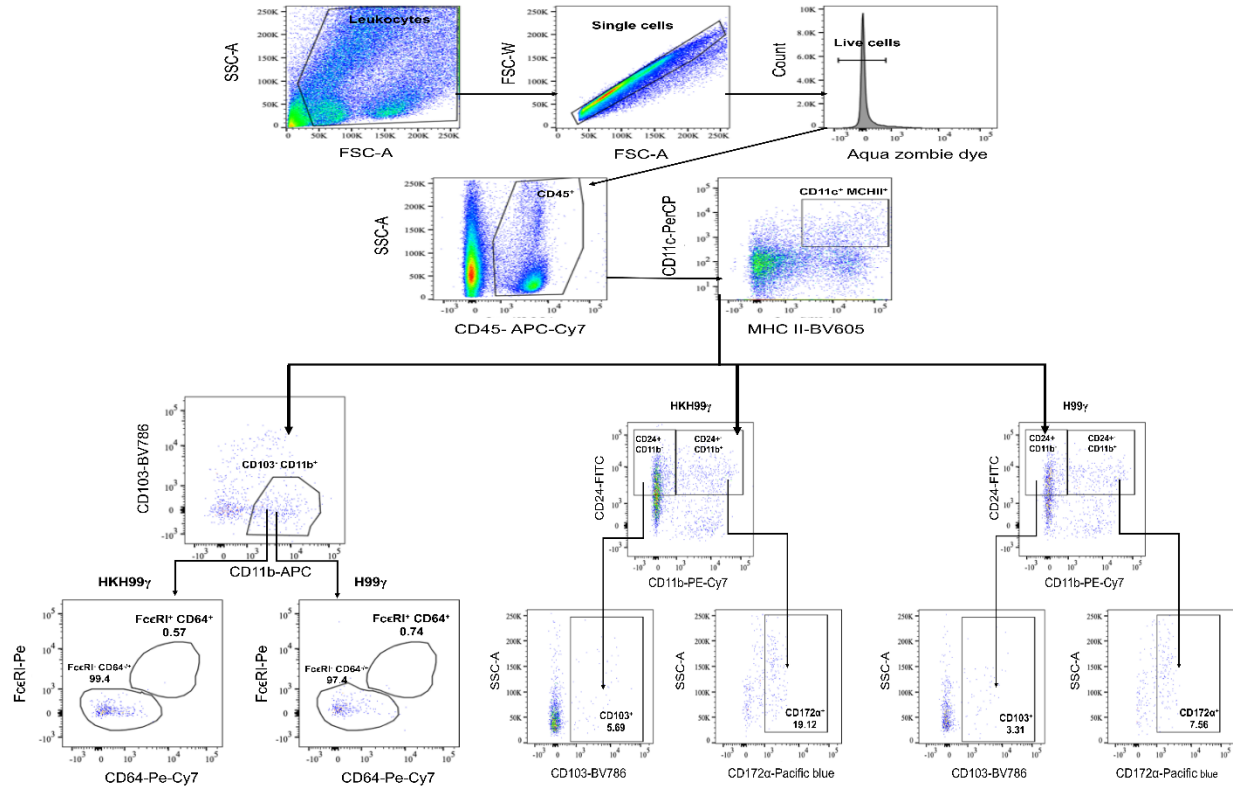

**Supplementary Figure 1. Gating strategy for lung conventional dendritic cells.** BALB/c mice were immunized via intranasal inhalation with  $10^4$  CFU of *C. neoformans* strain H99 $\gamma$  or HKH99 $\gamma$  in 50  $\mu$ l of sterile PBS. Seventy days later, mice were challenged with  $10^4$  CFU of *C. neoformans* strain H99 via intranasal inhalation. Pulmonary leukocytes were isolated from lung tissues by enzymatic digestion on day 1 post-challenge. Flow cytometry was used to determine the percentage of CD103 $^+$  cDCs (CD11c $^+$ /CD24 $^+$ /CD11b $^-$ /CD103 $^+$ ), CD11b $^+$ cDCs (CD11c $^+$ /CD24 $^+$ /CD11b $^+$ /CD172 $\alpha$  $^+$ ) and CD11b $^+$  monocyte-derived DCs (CD11c $^+$ /CD11b $^+$ /CD24 $^-$ /CD64 $^+$ / Fc $\epsilon$ R1 $\alpha$  $^+$ /Ly6C $^+$ /I-A/I-E $^+$ ) in the lung. Results shown are representative of four individual experiments using 5 mice per group.

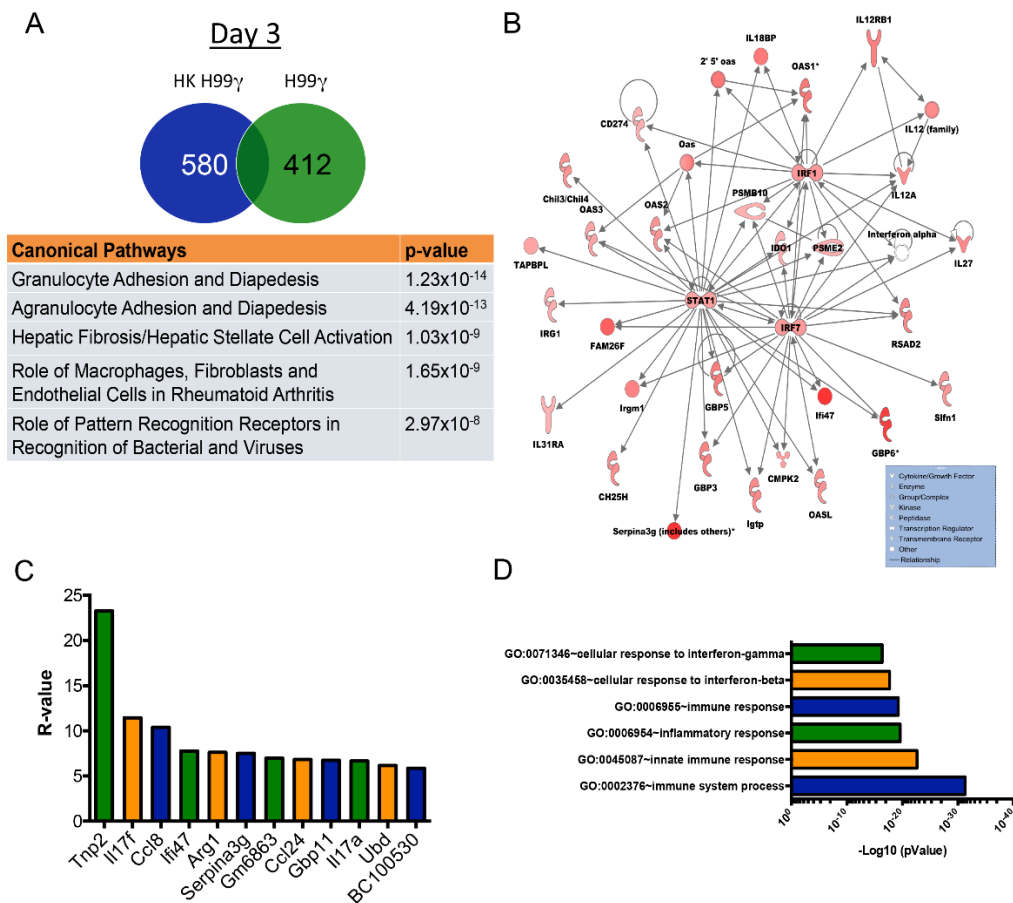

**Supplementary Figure 2. DCs from protectively immunized mice exhibit an interferon gamma response network gene expression profile.** BALB/c mice received an intranasal immunization with 10<sup>4</sup> CFU of *C. neoformans* strain H99 $\gamma$  or HKH99 $\gamma$  in 50  $\mu$ l of sterile PBS. Seventy days later, mice were subsequently infected with 10<sup>4</sup> CFU of *C. neoformans* strain H99. Pulmonary leukocytes were isolated from lung tissues by enzymatic digestion on day 3 post-inoculation. Leukocyte populations were depleted of CD3<sup>+</sup> cells by positive selection using  $\alpha$ -CD3e labeled magnetic beads and macrophages by positive selection using biotinylated  $\alpha$ -F4/80 and  $\alpha$ -biotin magnetic beads. DCs were isolated by positive selection using CD11c<sup>+</sup> magnetic beads. Total mRNA from isolated DC populations was extracted and RNA-seq was performed. **A.** Differently expressed genes and top canonical pathways and networks predicted by the Ingenuity Pathway Analysis software protectively immunized mice compared to non-protectively immunized mice as ranked by p-value. **B.** Top network up-regulated in day 3 post-challenge pulmonary DCs from protectively immunized mice compared to non-protectively immunized mice. The red color in the network figure corresponds to the log<sub>2</sub> of expression fold change and represents increased gene expression in DCs from protectively compared to non-protectively immunized mice. **C.** Fold change values for top 12 up-regulated genes from H99 $\gamma$  immunized DCs day 3 post-challenge. **D.** Top 6 GO terms from H99 $\gamma$  immunized DCs day 3 post-challenge. Data were generated from a merged data set from 3 independent experiments with 20-25 mice per group.

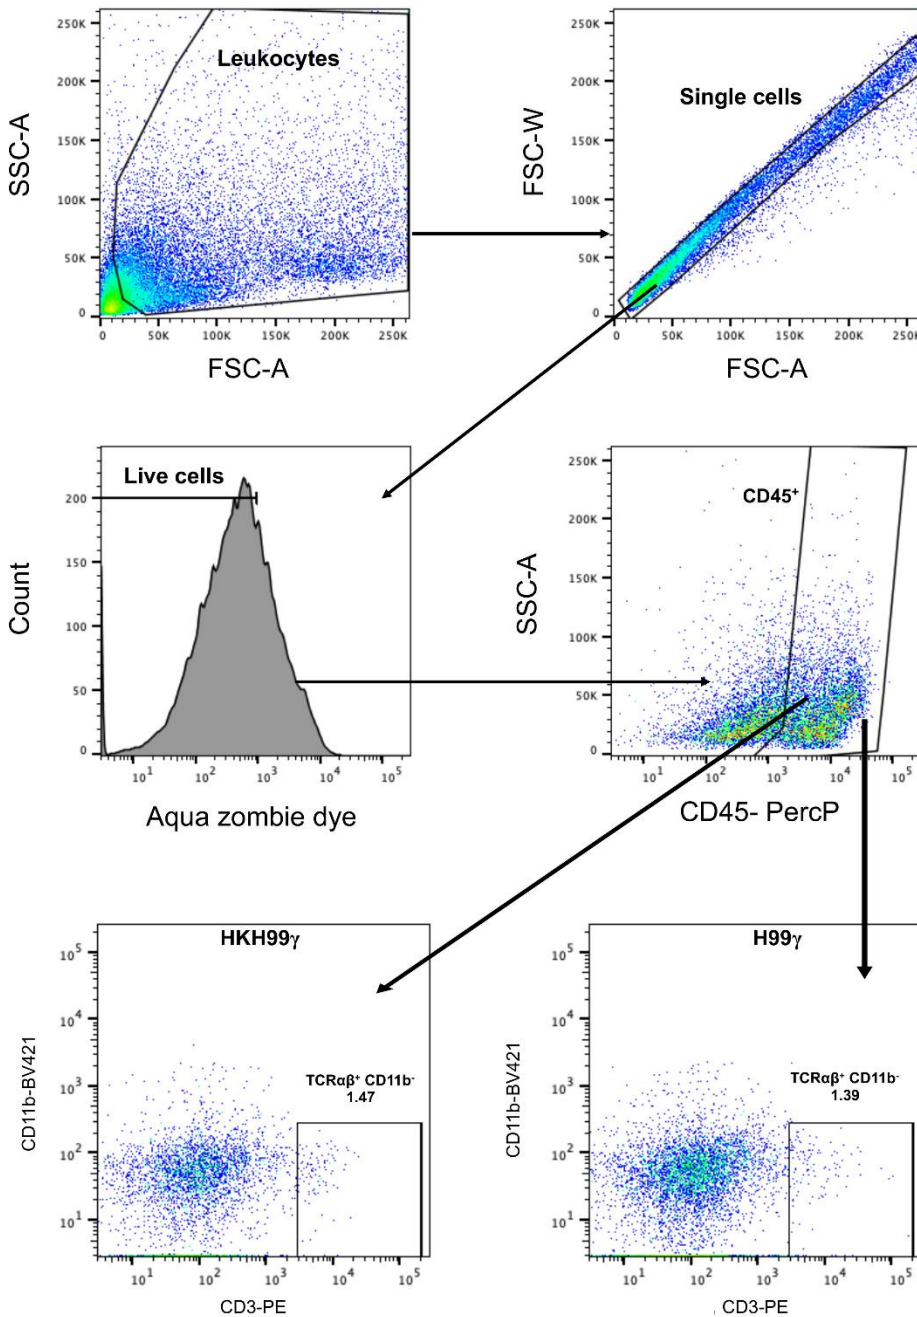

**Supplementary Figure 3. Presence of TCR $\alpha/\beta^+$  cells in dendritic cell enriched population.**

BALB/c mice were intranasally immunized with 10<sup>4</sup> CFU of *C. neoformans* strain H99 $\gamma$  or HKH99 $\gamma$  in 50  $\mu$ l of sterile PBS. After 70 days, DCs were isolated from the spleens of HKH99 $\gamma$  immunized or H99 $\gamma$  immunized mice after depletion of CD3<sup>+</sup> and F4/80<sup>+</sup> cells. Flow cytometry was used to determine percentage of TCR $\alpha/\beta^+$ /CD11b<sup>-</sup> cells in the enriched DC population derived from the spleens of immunized, unchallenged mice. Results shown are representative of three individual experiments using 3-4 mice per group.

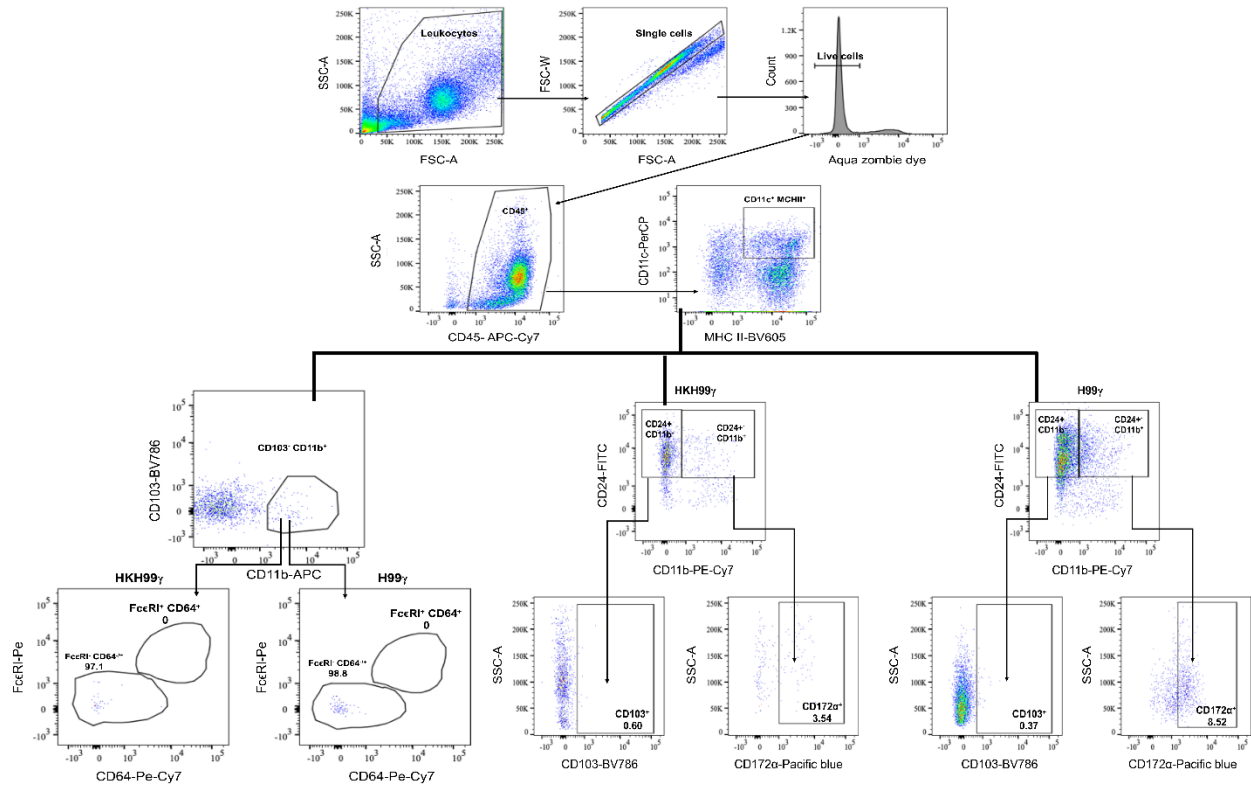

**Supplementary Figure 4. Phenotype of splenic dendritic cell enriched population.** BALB/c mice were intranasally immunized with  $10^4$  CFU of *C. neoformans* strain H99 $\gamma$  or HKH99 $\gamma$  in 50  $\mu$ l of sterile PBS. After 70 days, DCs were isolated from the spleens of HKH99 $\gamma$  immunized or H99 $\gamma$  immunized mice after depletion of CD3<sup>+</sup> and F4/80<sup>+</sup> cells. Flow cytometry was used to determine percentage of CD103<sup>+</sup> cDCs (CD11c<sup>+</sup>/CD24<sup>+</sup>/CD11b<sup>-</sup>/CD103<sup>+</sup>), CD11b<sup>+</sup>cDCs (CD11c<sup>+</sup>/CD24<sup>+</sup>/CD11b<sup>+</sup>/CD172 $\alpha$ <sup>+</sup>) and CD11b<sup>+</sup> monocyte-derived DCs (CD11c<sup>+</sup>/CD11b<sup>+</sup>/CD24<sup>-</sup>/CD64<sup>+</sup>/ Fc $\epsilon$ R1 $\alpha$ <sup>+</sup>/Ly6C<sup>+</sup>/I-A/I-E<sup>+</sup>) in the enriched DC population derived from the spleens of immunized, unchallenged mice. Results shown are representative of three individual experiments using 3-4 mice per group.

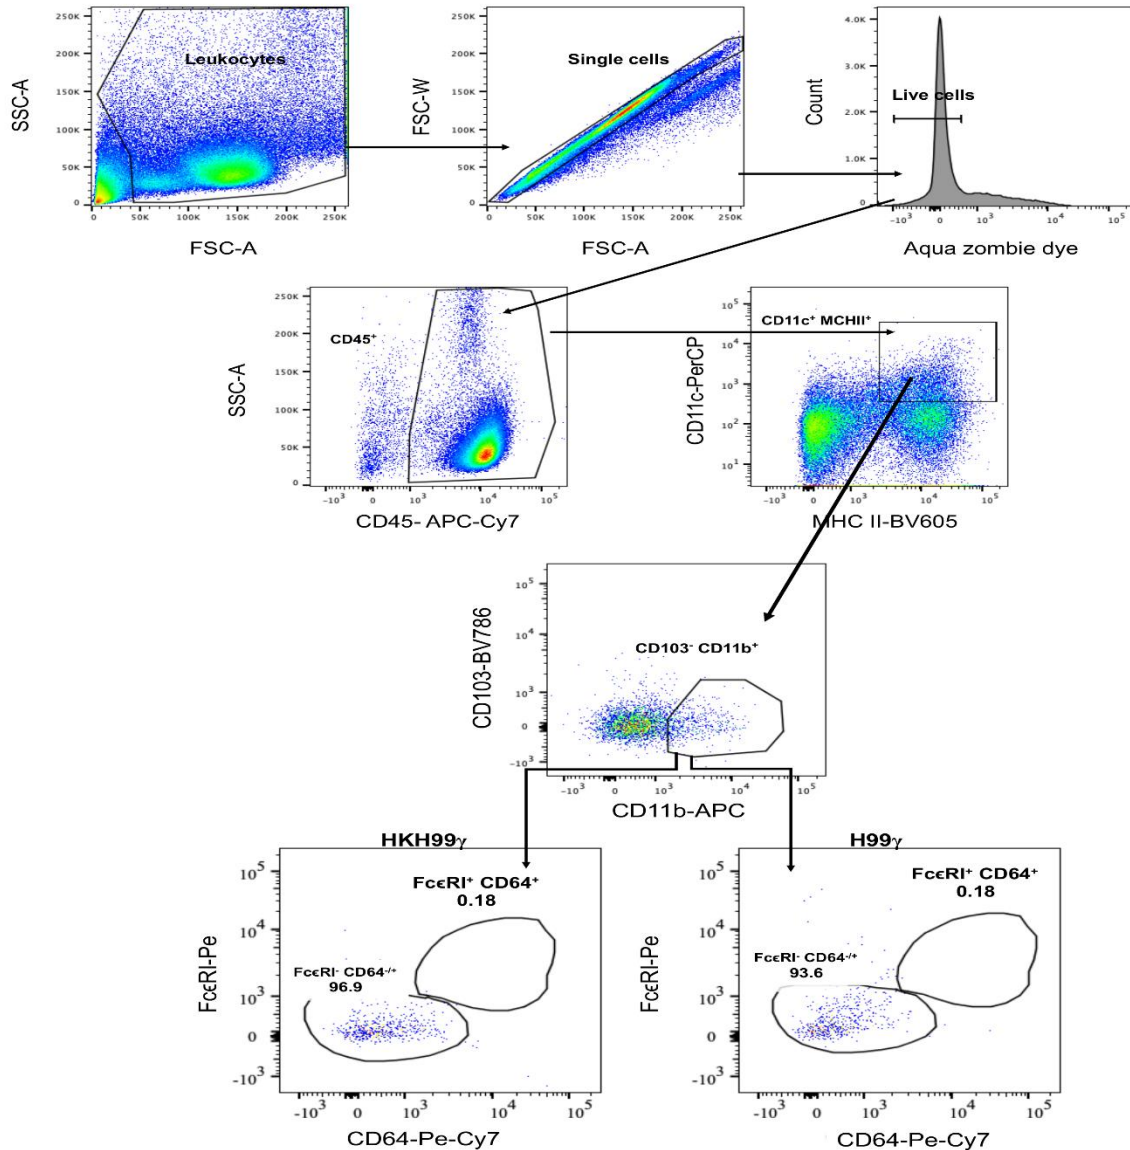

**Supplementary Figure 5. Phenotype of splenic dendritic cell population.** BALB/c mice were intranasally immunized with  $10^4$  CFU of *C. neoformans* strain H99 $\gamma$  or HKH99 $\gamma$  in 50  $\mu$ l of sterile PBS. After 70 days, DCs were isolated from the spleens of HKH99 $\gamma$  immunized or H99 $\gamma$  immunized mice. Flow cytometry was used to determine percentage of CD11b<sup>+</sup> monocyte-derived DCs (CD11c<sup>+</sup>/CD11b<sup>+</sup>/CD103<sup>+</sup>/CD64<sup>+</sup>/ FcεRI $\alpha$ <sup>+</sup>/Ly6C<sup>+</sup>/I-A/I-E<sup>+</sup>) in cell population derived from the spleens of immunized, unchallenged mice. Results shown are representative of three individual experiments using 3-4 mice per group.

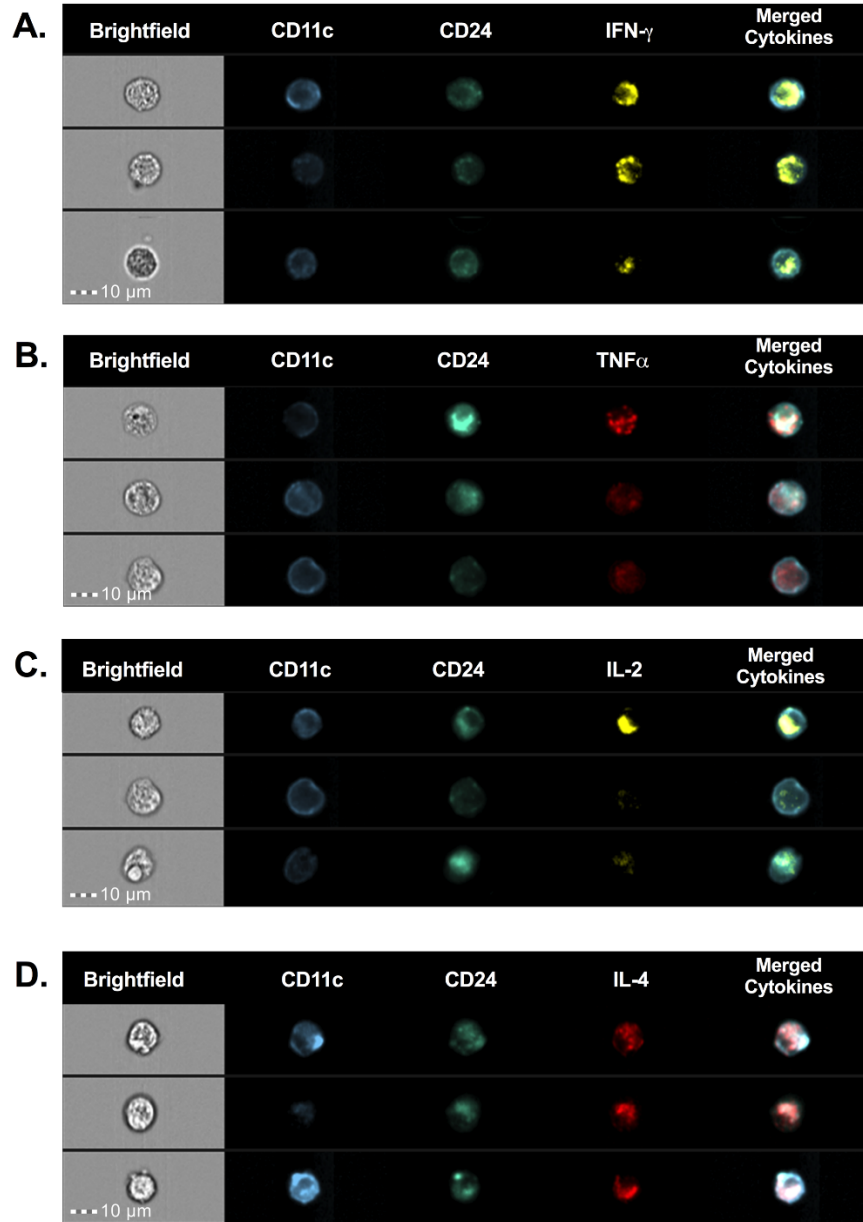

**Supplementary Figure 6. Flow cytometry analysis of intracellular cytokine production.** BALB/c mice were immunized with *C. neoformans* strain H99 $\gamma$  and rested for 70 days. Dendritic cells were isolated from the spleens and cultured *ex vivo* with *C. neoformans* *cnal* $\Delta$ . Production of cytokines **A-D**. IFN- $\gamma$ , TNF- $\alpha$ , IL-2, and IL-4 were verified by intracellular flow cytometry after 6 hours of culture. Data shown is representative of 3 individual experiments with 10 mice per group.

## Lactate assay

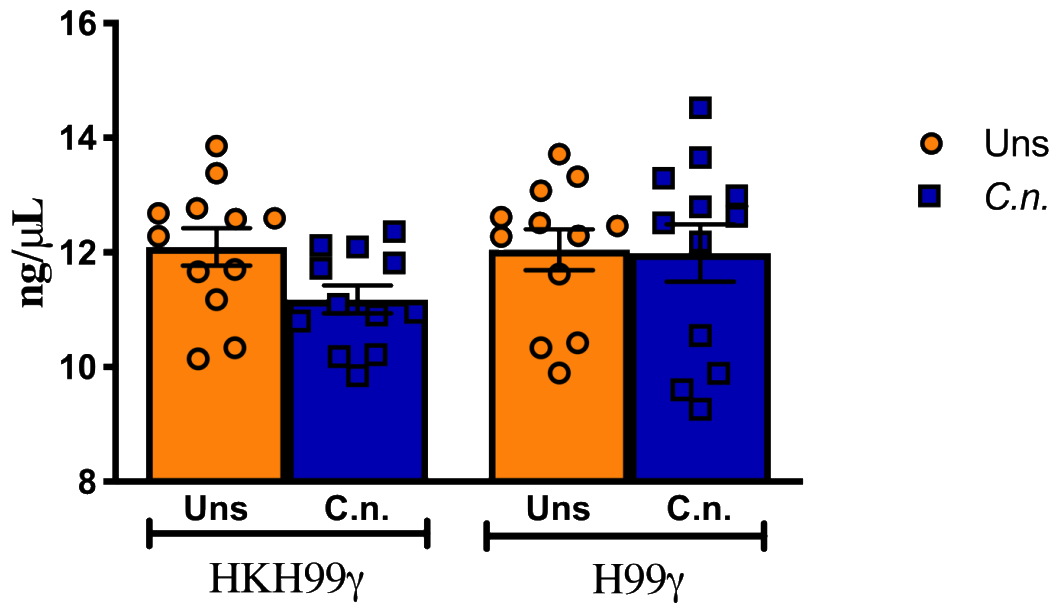

**Supplementary Figure 7. Lactate release by dendritic cells.** Dendritic cells (DCs) were isolated from the lungs of BALB/c mice intranasally immunized with  $10^4$  CFU of *C. neoformans* strain H99γ or HKH99γ in 50 μl of sterile PBS. After 70 days, DCs were isolated from the lungs and cultured in RPMI complete media alone (Uns) or media + *C. neoformans* calcineurin mutant (C.n.) for 24 hours at 37°C in 5% CO<sub>2</sub>. Subsequently, the supernatant was collected lactate dehydrogenase removed and L-lactate concentration determined. No significant difference in L-lactate release was observed between groups. Error bars are +/- standard error of the mean (SEM). one-way ANOVA
